# Supplementary material
Source: Springer Nature journal article supplement (https://springermedizin.de/resource/supplementary/12984_2011_326_MOESM1_ESM.pdf/9605790)
Supplement: MOESM1 [file 9605790]

P5  
(SIAS 2)

P9  
(SIAS 3)

P10  
(SIAS 4)

H1  
(SIAS 5)

Path (mm)

A

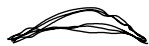

0 200 (mm)

B

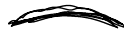

C

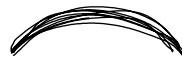

D

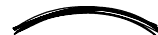

Speed (m/s)

E

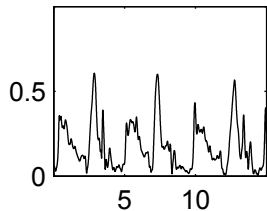

F

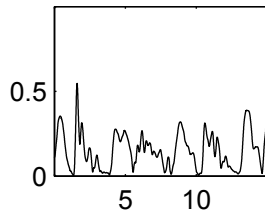

G

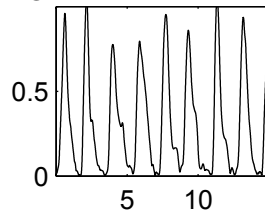

H

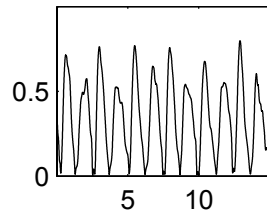

Curvature  
(1/mm)

I

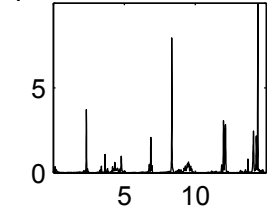

J

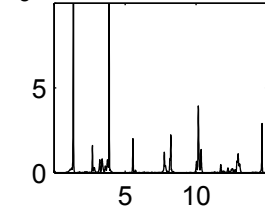

K

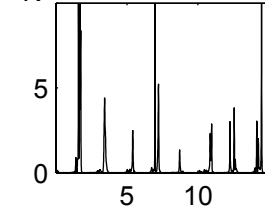

L

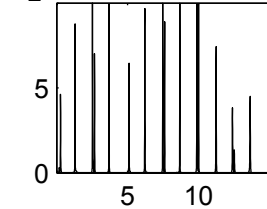

Zoomed  
Curvature  
(1/mm)

M

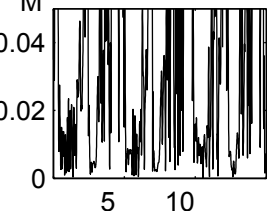

N

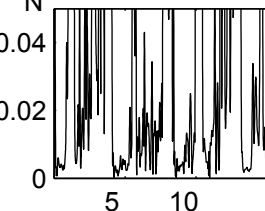

O

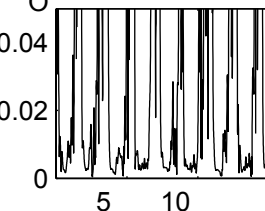

P

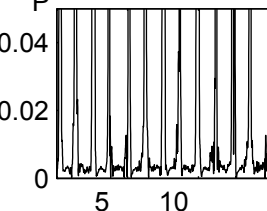

Jerk (m/s<sup>3</sup>)

Q

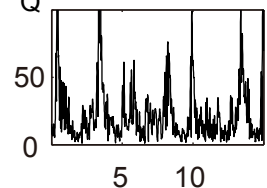

R

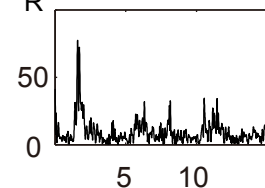

S

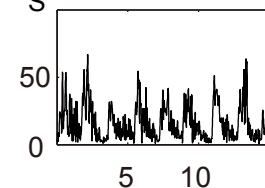

T

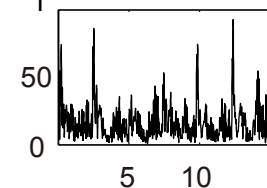

Time (s)

Time (s)

Time (s)

Time (s)
